# Supplementary material
Source: PubMed Central journal article supplement (PMC515079)

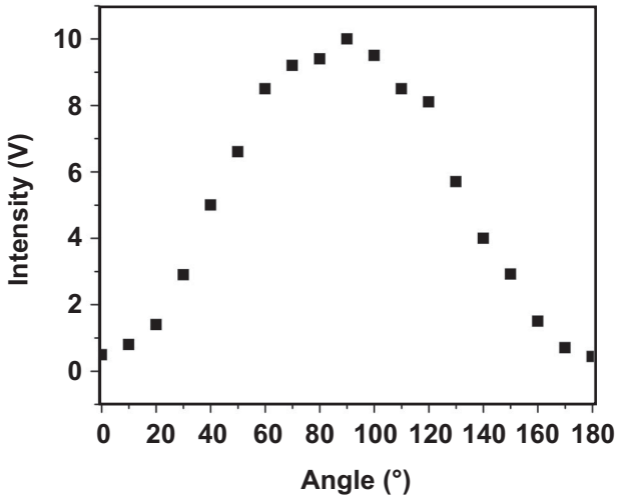

Supplement: pnas_101_34_12434__4.pdf [file pnas_101_34_12434__4.pdf]
